# Supplementary material for: Three-dimensional QCA-based vessel fractional flow reserve (vFFR) in Heart Team decision-making: a multicentre, retrospective, cohort study
Source: HighWire-hosted journal article supplement (doi:10.1136/bmjopen-2021-054202), 2022-04-01
Supplement: bmjopen-2021-054202supp001_data_supplement.pdf [file bmjopen-2021-054202supp001_data_supplement.pdf]

**Supplementary Materials:**

**Three-dimensional QCA-based vessel fractional flow reserve (vFFR) in Heart Team decision-making: a multicenter, retrospective, cohort study**

**Online Table 1. Baseline characteristics in patients stratified according to presence of vFFR-confirmed lesion significance and revascularization discordance****SD – standard deviation; COPD – chronic obstructive pulmonary disease; PCI –**

|                                  | <b>Concordant<br/>(N=292)</b> | <b>Discordant<br/>(N = 124)</b> | <b>p value</b> |
|----------------------------------|-------------------------------|---------------------------------|----------------|
| <b>Demographics</b>              |                               |                                 |                |
| <b>Age (years), mean ± SD</b>    | <b>65.1 ± 12.8</b>            | <b>66.2 ± 9.4</b>               | <b>0.736</b>   |
| <b>Male</b>                      | <b>210 (71.9%)</b>            | <b>86 (69.4%)</b>               | <b>0.598</b>   |
| <b>Hypertension</b>              | <b>190 (65.1%)</b>            | <b>91 (73.4%)</b>               | <b>0.097</b>   |
| <b>Diabetes mellitus</b>         | <b>96 (32.9%)</b>             | <b>52 (41.9%)</b>               | <b>0.078</b>   |
| <b>Dyslipidemia</b>              | <b>151 (51.7%)</b>            | <b>80 (64.5%)</b>               | <b>0.854</b>   |
| <b>Renal function impairment</b> | <b>18 (6.2%)</b>              | <b>12 (9.7%)</b>                | <b>0.205</b>   |
| <b>COPD</b>                      | <b>24 (8.2%)</b>              | <b>14 (11.3%)</b>               | <b>0.320</b>   |
| <b>Positive family history</b>   | <b>87 (29.8)</b>              | <b>40 (32.3%)</b>               | <b>0.618</b>   |
| <b>Smoking</b>                   | <b>40 (13.7%)</b>             | <b>26 (21.0%)</b>               | <b>0.063</b>   |
| <b>Previous PCI</b>              | <b>67 (21.9%)</b>             | <b>38 (33.1%)</b>               | <b>0.098</b>   |
| <b>Previous MI</b>               | <b>68 (23.3%)</b>             | <b>24 (19.4%)</b>               | <b>0.377</b>   |
| <b>Previous stroke or TIA</b>    | <b>17 (5.8%)</b>              | <b>8 (6.5%)</b>                 | <b>0.805</b>   |

**percutaneous coronary intervention, MI – myocardial infarction, TIA – transient ischemic attack**

**Online Table 2.****Summary of studies evaluating impact invasive FFR/iFR assessment on reclassification of treatment strategy.**

| <b>Study Population</b> | <b>Pressure Wire Assessment/ Included Lesions</b> | <b>Change in Treatment Strategy</b> | <b>Trial</b>  | <b>Year</b> |
|-------------------------|---------------------------------------------------|-------------------------------------|---------------|-------------|
| Multivessel disease     | FFR and/or iFR                                    | 26.9% (130 / 484 patients)          | DEFINE        | 2018        |
|                         | Intermediate lesions                              |                                     | REAL          |             |
| FFR in $\geq 1$ vessel  | FFR                                               | 44.2% (406 / 918 patients)          | POST-IT       | 2016        |
|                         | Operator's discretion                             |                                     |               |             |
| NSTEMI                  | FFR                                               | 21.6% (38 / 176 patients)           | FAMOUS-NSTEMI | 2015        |
|                         | All lesions with $\geq 30\%$ stenosis             |                                     |               |             |
| Ambiguous stenosis +    | FFR                                               | 43.2% (464 / 1,075 patients)        | R3F           | 2014        |
|                         | Angiographically 35% to 65% stenosis              |                                     |               |             |
| Stable chest pain       | FFR                                               | 26.5% (53 / 200 patients)           | RIPCORDER     | 2014        |
|                         | All coronary arteries $\geq 2.25$ mm              |                                     |               |             |

FFR – fractional flow reserve

Online Fig. 1 Computation of three-vessel vessel fractional flow reserve (vFFR)

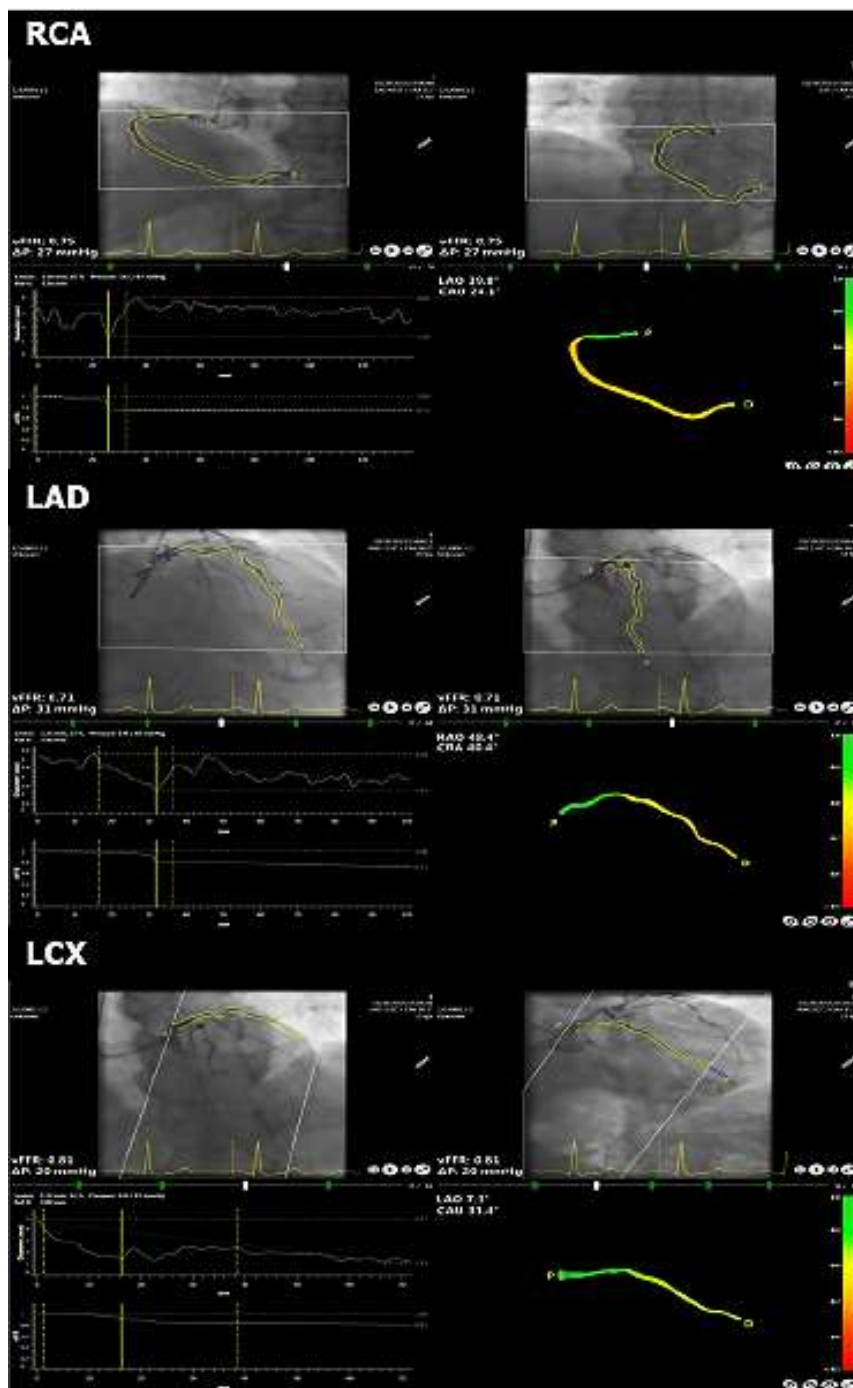

RCA – right coronary artery, LAD- left anterior descending, LCX – left circumflex artery

**Online Fig. 2** Cumulative frequency of A) 3D-QCA based percentage diameter stenosis (%DS), B) vessel fractional flow reserve (vFFR), and C) a cumulative frequency of vFFR values in lesions categorized according to %DS cut-off of 40% [4].

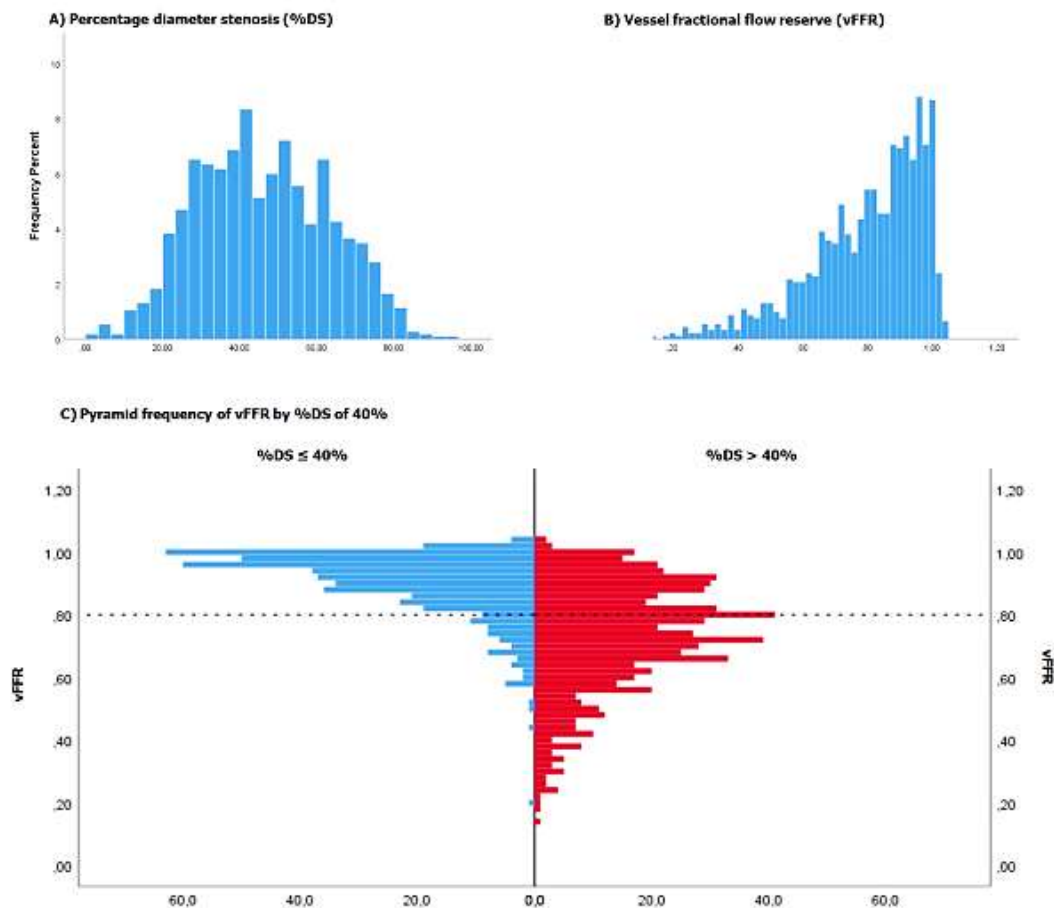

**3D-QCA – three dimensional quantitative coronary angiography, %DS – percentage diameter stenosis, vFFR – vessel fractional flow reserve**

**Online Fig. 3 Example of two patients who underwent coronary artery bypass grafting (CABG) with graft implantation to three major coronary arteries.**

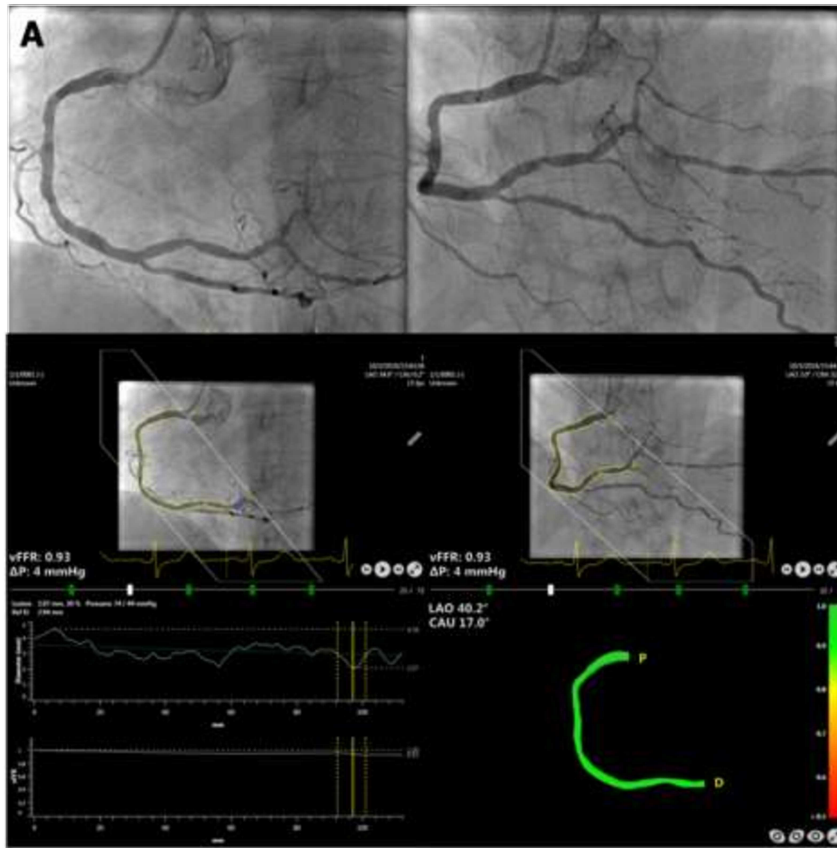

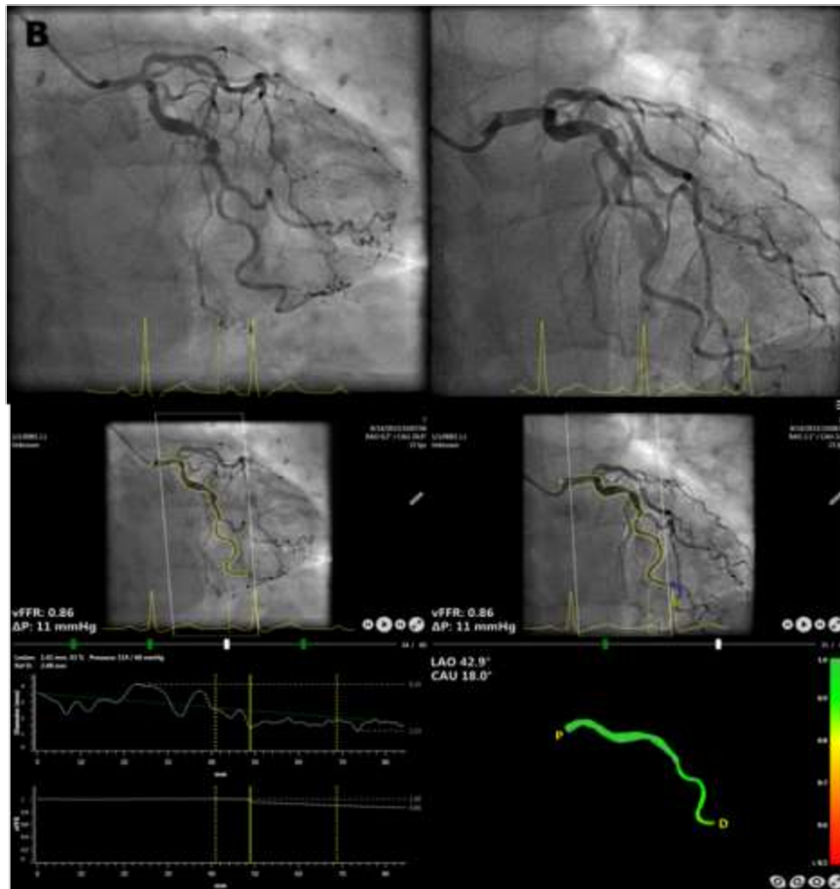

**A) Whereas the lesions in LAD and LCX were concordantly significant by angiography and vFFR, the lesion in RCA was found not to be functionally significant by vFFR.**

**B) Whereas the lesions in LAD and RCA were concordantly significant by angiography and vFFR, the lesion in CX was not to be functionally significant by vFFR.**
